# Supplementary material for: Efficacy of low-level laser therapy in patients with lower extremity tendinopathy or plantar fasciitis: systematic review and meta-analysis of randomised controlled trials
Source: HighWire-hosted journal article supplement (doi:10.1136/bmjopen-2021-059479), 2022-09-01
Supplement: bmjopen-2021-059479supp001_data_supplement.pdf [file bmjopen-2021-059479supp001_data_supplement.pdf]

Supplemental digital content for the article:

## **Efficacy of low-level laser therapy in patients with lower extremity tendinopathy or plantar fasciitis: systematic review and meta-analysis of randomised controlled trials**

### Contents

|                                                                                                       |   |
|-------------------------------------------------------------------------------------------------------|---|
| PubMed database search string.....                                                                    | 2 |
| Excluded full text articles .....                                                                     | 2 |
| Supplementary figures .....                                                                           | 3 |
| Figure S1 Pain at follow-ups 4-8 weeks after completed therapy - LLLT versus placebo .....            | 3 |
| Figure S2 Subgroup pain results immediately after completed therapy - LLLT versus no intervention ..  | 3 |
| Figure S3 Pain at follow-ups 8 weeks after completed therapy - LLLT versus no intervention.....       | 3 |
| Figure S4 Overall and subgroup pain results - LLLT versus other interventions .....                   | 4 |
| Figure S5 Pain at follow-ups 4-12 weeks after completed therapy - LLLT versus other interventions.... | 4 |
| Figure S6 Disability at follow-ups 4-8 weeks after completed therapy - LLLT versus placebo.....       | 4 |
| Figure S7 Disability immediately after completed therapy - LLLT versus placebo .....                  | 5 |
| Figure S8 Disability immediately after completed therapy - LLLT versus other interventions.....       | 5 |
| Figure S9 Disability immediately after completed therapy - LLLT versus no intervention .....          | 5 |
| Figure S10 Disability at follow-up 9 weeks after completed therapy - LLLT versus no intervention..... | 5 |
| Sensitivity analyses.....                                                                             | 6 |
| Figure S11 Alternative LLLT dose subgrouping.....                                                     | 6 |
| Risk-of-bias within studies post-hoc analyses .....                                                   | 6 |
| Figure S12 Blinded versus unblinded assessor.....                                                     | 6 |
| Figure S13 Blinded versus unblinded therapist .....                                                   | 7 |
| Risk-of-bias across studies - random versus fixed effects meta-analysis results of pain .....         | 7 |
| Figure S14 Random effects meta-analysis model.....                                                    | 7 |
| Figure S15 Fixed effects meta-analysis model.....                                                     | 8 |
| Figure S16 Funnel plot.....                                                                           | 8 |

## PubMed database search string

("Low-Level Light Therapy"[Mesh] OR LLLT[Title/Abstract] OR "low level"[Title/Abstract] OR "low power"[Title/Abstract] OR laser therap\*[Title/Abstract] OR "laser acupuncture"[Title/Abstract] OR "HeNe"[Title/Abstract] OR "632 nm"[Title/Abstract] OR "Ga-Al-As"[Title/Abstract] OR "820 nm"[Title/Abstract] OR "830 nm"[Title/Abstract] OR "850 nm"[Title/Abstract] OR "GaAs"[Title/Abstract] OR "904 nm"[Title/Abstract] OR Photobiomodulation[Title/Abstract] OR phototherap\*[Title/Abstract]) and ("Tendinopathy"[Mesh] or tendi\*[Title/Abstract] or tendo\*[Title/Abstract] or "plantar fasciitis"[Title/Abstract] or "Fasciitis, Plantar"[Mesh] or "Policeman's Heel"[Title/Abstract] or "Iliotibial Band Syndrome"[Mesh] or Iliopsoas tendi\*[Title/Abstract] or Jumper\*[Title/Abstract] or Patella[Title/Abstract] or Achill\*[Title/Abstract] or "Achilles Tendon"[Mesh])

## Excluded full text articles

| Author/Year/Reference                       | Reasons for exclusion                                                           |
|---------------------------------------------|---------------------------------------------------------------------------------|
| Abat et al. 2016 <sup>1</sup>               | Impossible to isolate effect, combined treatments compared with other treatment |
| Aigner et al. 1996 <sup>2</sup>             | No control group                                                                |
| Ashok et al. 2018 <sup>3</sup>              | Lacks randomisation                                                             |
| Atik et al. 2018 <sup>4</sup>               | Commentary only                                                                 |
| Bjordal et al. 2006 <sup>5</sup>            | Outcomes of interest not reported                                               |
| Chang et al. 2015 <sup>6</sup>              | Outcomes of interest not reported                                               |
| Cinar et al. 2013 <sup>7</sup>              | Conference paper only (author contacted)                                        |
| Cinar et al. 2012 <sup>8</sup>              | Solely abstract available                                                       |
| Costantino et al. 2005 <sup>9</sup>         | Not LLLT, high intensity laser therapy                                          |
| Coughlin et al. 2014 <sup>10</sup>          | Solely abstract available                                                       |
| Fernandes et al. 1991 <sup>11</sup>         | Mixed population with unclear inclusion of diagnosis                            |
| Foley et al. 2016 <sup>12</sup>             | Not LLLT, light emitting diode therapy                                          |
| Jastifer et al. 2014 <sup>13</sup>          | No control group                                                                |
| Lögberg-Andersson et al. 1994 <sup>14</sup> | Only pooled data on lower and upper extremity available                         |
| Mardh et al. 2016 <sup>15</sup>             | Not LLLT, high intensity laser therapy                                          |
| Meier et al. 1988 <sup>16</sup>             | Outcomes of interest not reported                                               |
| Morimoto et al. 2013 <sup>17</sup>          | No control group                                                                |
| Mulcahy et al. 1995 <sup>18</sup>           | Lacks credible control group, includes only 3 patients with tendinopathy        |
| Notarnicola et al. 2014 <sup>19</sup>       | Not LLLT, high intensity laser therapy                                          |
| Olivera et al. 2009 <sup>20</sup>           | Animal study                                                                    |
| Orellana-Molina et al. 2010 <sup>21</sup>   | Outcomes of interest not reported                                               |
| Saxena et al. 2015 <sup>22</sup>            | Not LLLT                                                                        |
| Scott et al. 2011 <sup>23</sup>             | Review                                                                          |
| Siebert et al. 1987 <sup>24</sup>           | Mixed population/diagnoses                                                      |
| Simunovic 1996 <sup>25</sup>                | Narrative review                                                                |
| Suleymanoglu et al. 2014 <sup>26</sup>      | Conference abstract                                                             |
| Takla et al. 2019 <sup>27</sup>             | Used a combination of LLLT and light emitting diode therapy                     |
| Tumilty et al. 2015 <sup>28</sup>           | Conference abstract                                                             |
| Tumilty et al. 2016 <sup>29</sup>           | Not LLLT, high intensity laser therapy                                          |

LLLT, low-level laser therapy.

## Supplementary figures

Figure S1 Pain at follow-ups 4-8 weeks after completed therapy - LLLT versus placebo

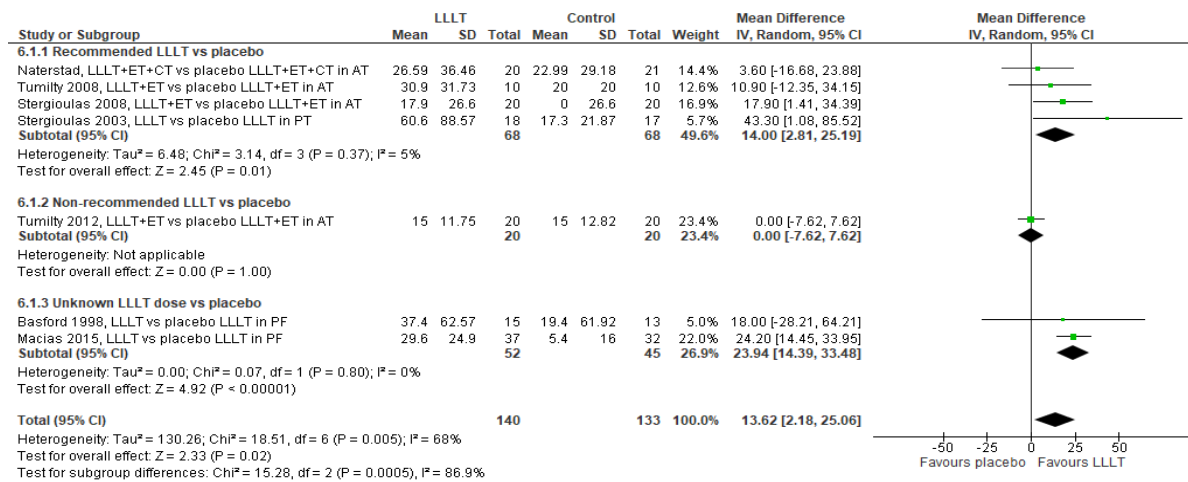

AT, Achilles tendinopathy; CT, cryotherapy; ESWT, Extracorporeal Shock Wave Therapy; ET, exercise therapy; I, insoles; LLLT, Low-Level Laser Therapy; PF, plantar fasciitis; PT, patellar tendinopathy; S, stretching; TU, Therapeutic Ultrasound.

Figure S2 Subgroup pain results immediately after completed therapy - LLLT versus no intervention

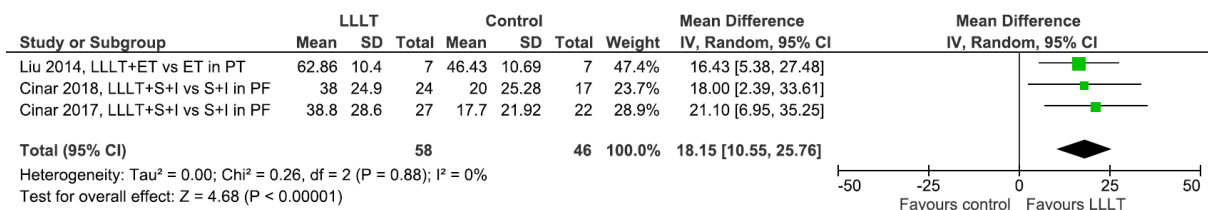

ET, exercise therapy; I, insoles; LLLT, Low-Level Laser Therapy; PF, plantar fasciitis; PT, patellar tendinopathy; S, stretching.

Figure S3 Pain at follow-ups 8 weeks after completed therapy - LLLT versus no intervention

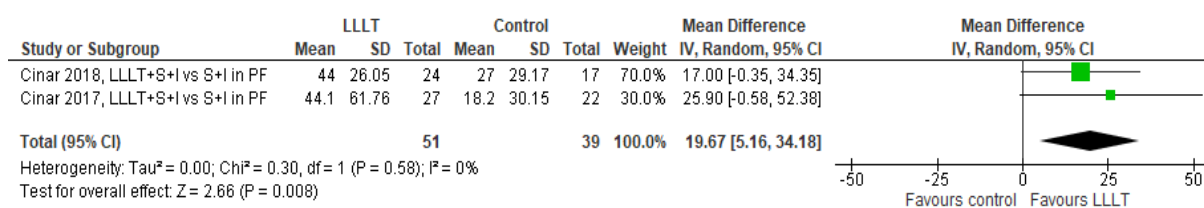

ET, exercise therapy; I, insoles; LLLT, Low-Level Laser Therapy; PF, plantar fasciitis; S, stretching.

Figure S4 Overall and subgroup pain results - LLLT versus other interventions

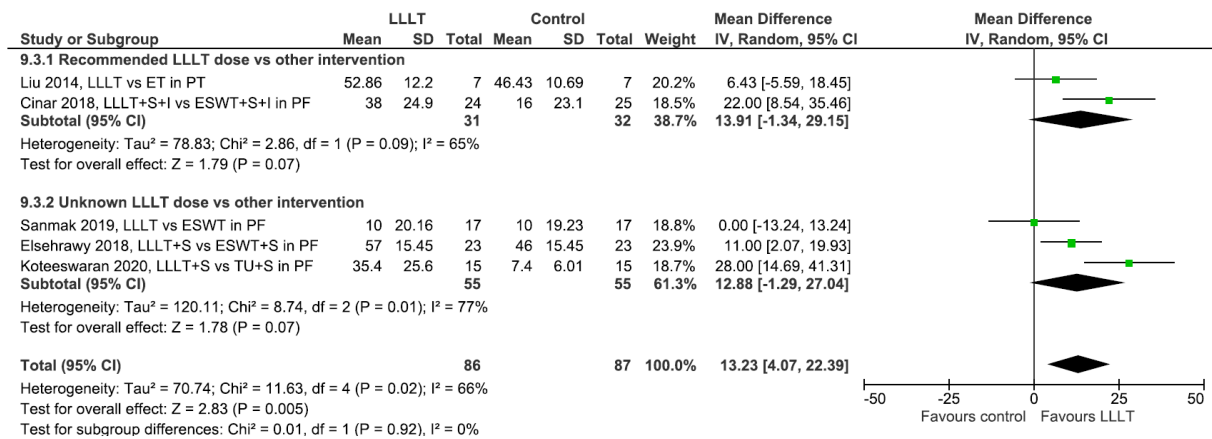

ESWT, Extracorporeal Shock Wave Therapy; ET, exercise therapy; I, insoles; LLLT, Low-Level Laser Therapy; PF, plantar fasciitis; PT, patellar tendinopathy; S = stretching; TU, Therapeutic Ultrasound.

Figure S5 Pain at follow-ups 4-12 weeks after completed therapy - LLLT versus other interventions

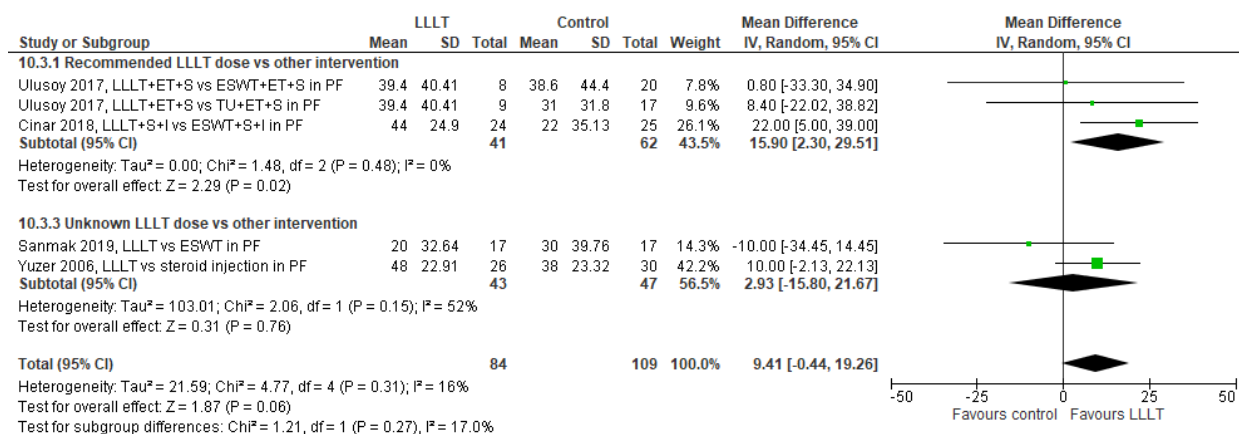

AT, Achilles tendinopathy; CT, cryotherapy; ESWT, Extracorporeal Shock Wave Therapy; ET, exercise therapy; I, insoles; LLLT, Low-Level Laser Therapy; PF, plantar fasciitis; PT, patellar tendinopathy; S, stretching; TU, Therapeutic Ultrasound.

Figure S6 Disability at follow-ups 4-8 weeks after completed therapy - LLLT versus placebo

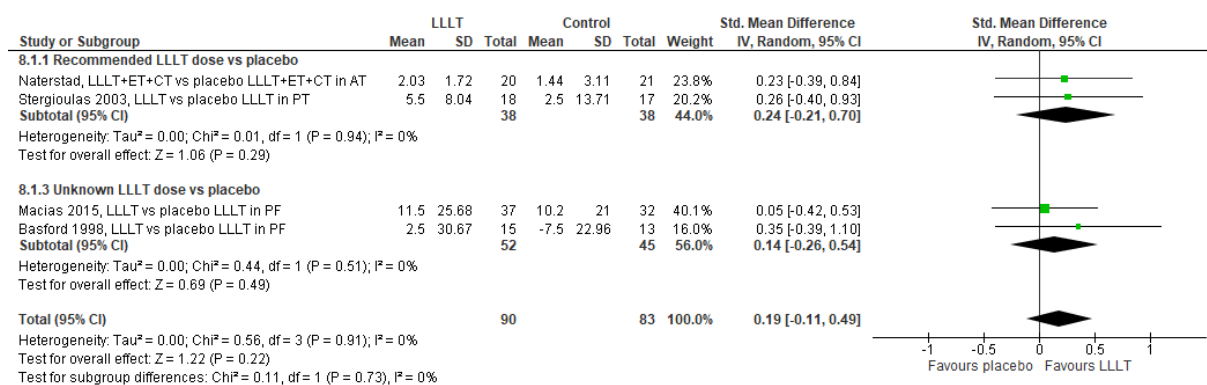

AT, Achilles tendinopathy; CT, cryotherapy; ET, exercise therapy; LLLT, Low-Level Laser Therapy; PF, plantar fasciitis; PT, patellar tendinopathy.

Figure S7 Disability immediately after completed therapy - LLLT versus placebo

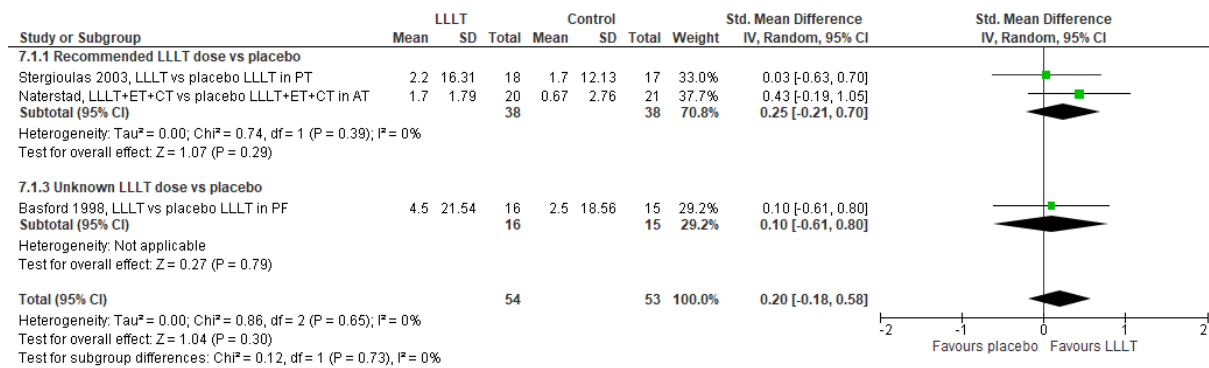

AT, Achilles tendinopathy; CT, cryotherapy; ET, exercise therapy; LLLT, Low-Level Laser Therapy; PF, plantar fasciitis; PT, patellar tendinopathy.

Figure S8 Disability immediately after completed therapy - LLLT versus other interventions

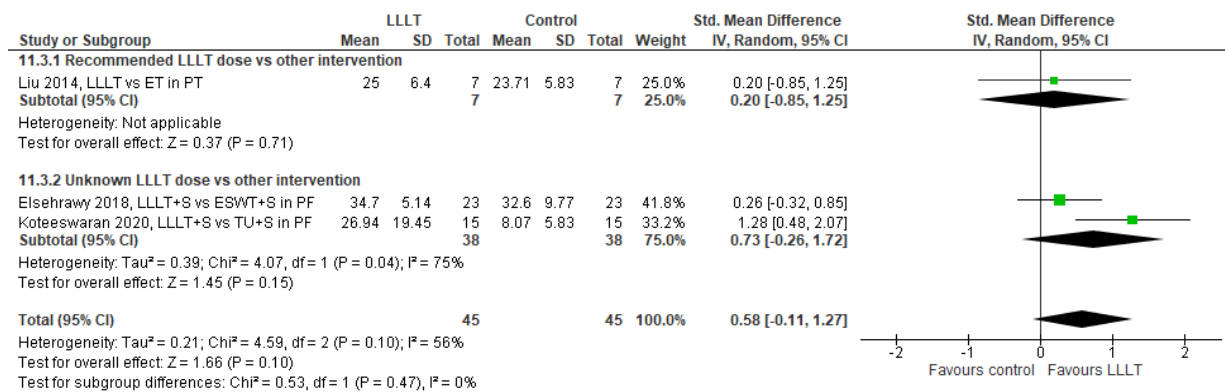

ET, exercise therapy; ESWT, Extracorporeal Shock Wave Therapy; LLLT, Low-Level Laser Therapy; PF, plantar fasciitis; PT, patellar tendinopathy; S, stretching; TU, Therapeutic Ultrasound.

Figure S9 Disability immediately after completed therapy - LLLT versus no intervention

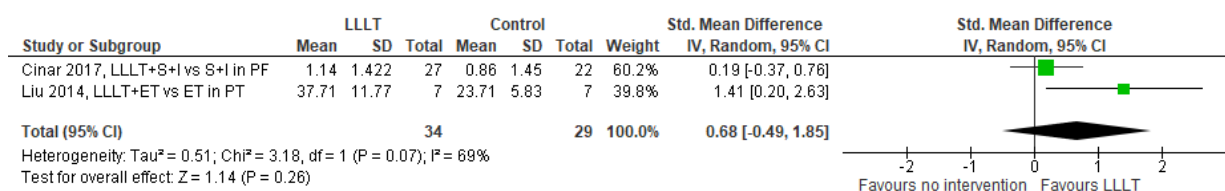

ET, exercise therapy; I, insoles; LLLT, Low-Level Laser Therapy; PF, plantar fasciitis; PT, patellar tendinopathy; S, stretching.

Figure S10 Disability at follow-up 9 weeks after completed therapy - LLLT versus no intervention

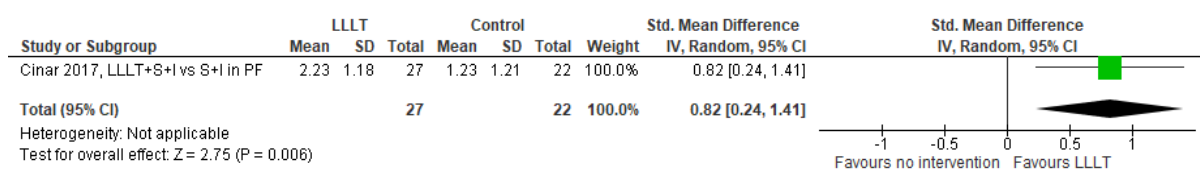

ET, exercise therapy; I, insoles; LLLT, Low-Level Laser Therapy; PF, plantar fasciitis; PT, patellar tendinopathy; S, stretching.

## Sensitivity analyses

Allocating the study by Darre et al. 1994 to the unknown laser dose subgroup eliminates the statistical heterogeneity in the recommended laser dose subgroup and increases the estimate of placebo-controlled pain reduction to 21.12 mm VAS ((95% CI: 14.94 to 27.31),  $I^2 = 0\%$ ,  $N = 278$ ) immediately after completed therapy (Figure S11).

Figure S11 Alternative LLLT dose subgrouping

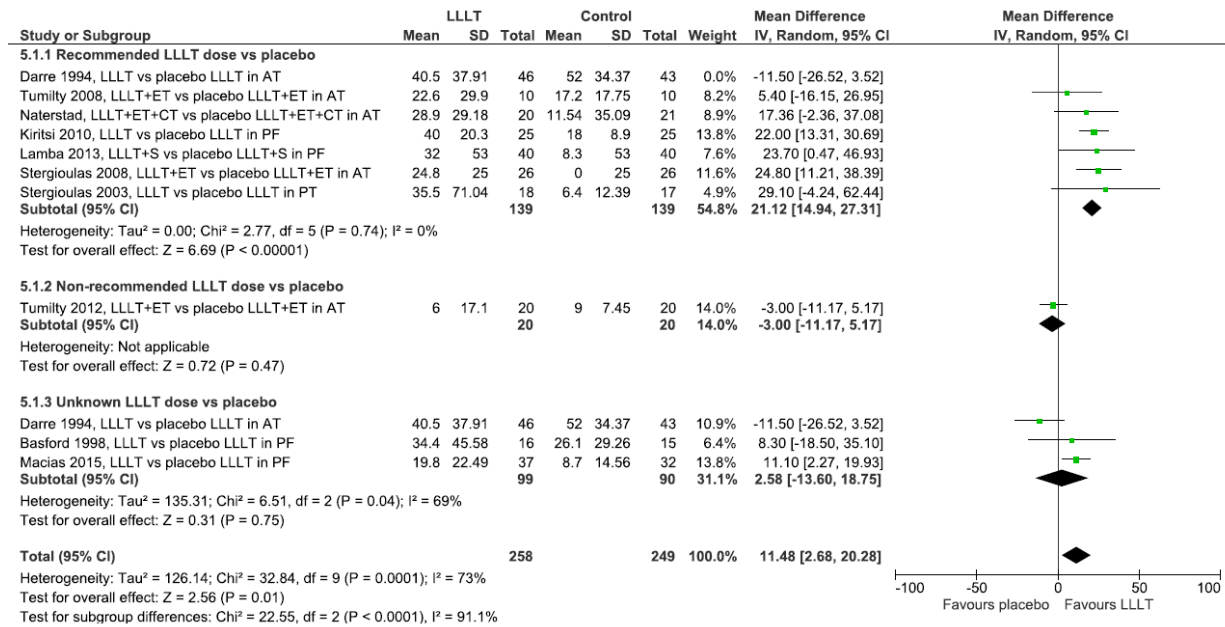

AT, Achilles tendinopathy; CT, cryotherapy; ET, exercise therapy; LLLT, Low-Level Laser Therapy; PF, plantar fasciitis; PT, patellar tendinopathy; S, stretching.

## Risk-of-bias within studies post-hoc analyses

Figure S12 Blinded versus unblinded assessor

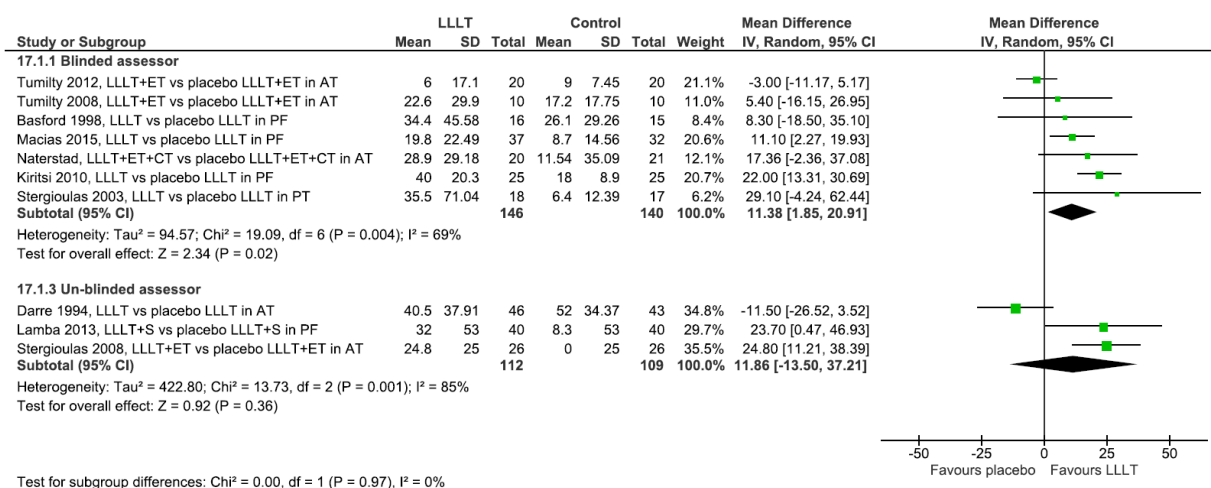

AT, Achilles tendinopathy; CT, cryotherapy; ET, exercise therapy; LLLT, Low-Level Laser Therapy; PF, plantar fasciitis; PT, patellar tendinopathy; S, stretching.

Figure S13 Blinded versus unblinded therapist

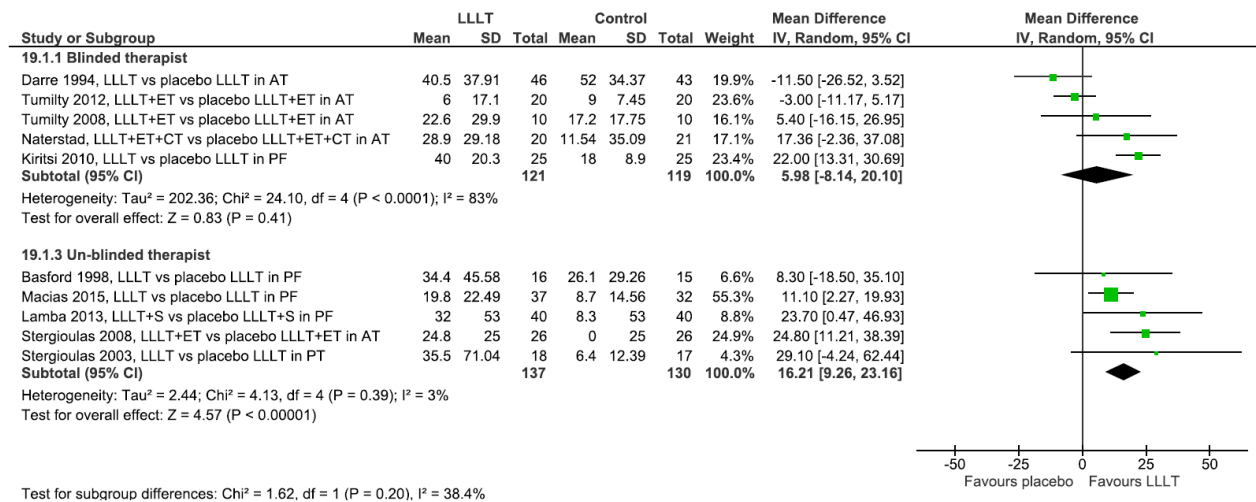

AT, Achilles tendinopathy; CT, cryotherapy; ET, exercise therapy; LLLT, Low-Level Laser Therapy; PF, plantar fasciitis; PT, patellar tendinopathy; S, stretching.

### Risk-of-bias across studies - random versus fixed effects meta-analysis results of pain

There was almost no difference between the pain point estimates of the random and fixed effects models (pain immediately after the end of therapy), that is, 11.48 mm versus 10.21 mm VAS, indicating that no small study bias exists (Figures S14 and S15).

Figure S14 Random effects meta-analysis model

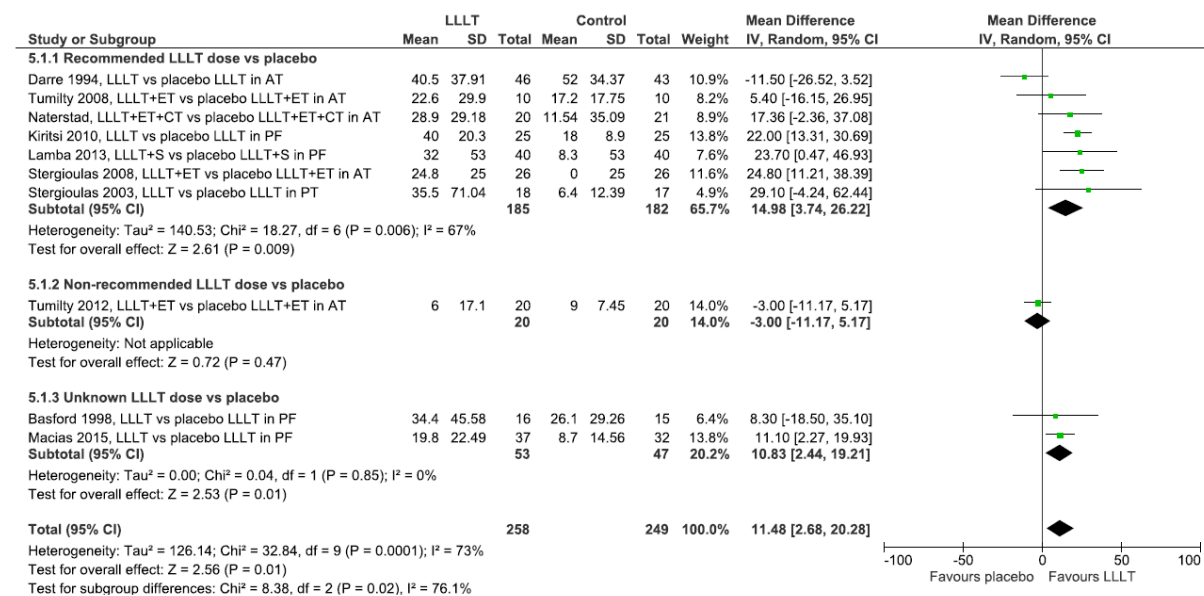

AT, Achilles tendinopathy; CT, cryotherapy; ET, exercise therapy; LLLT, Low-Level Laser Therapy; PF, plantar fasciitis; PT, patellar tendinopathy; S, stretching.

Figure S15 Fixed effects meta-analysis model

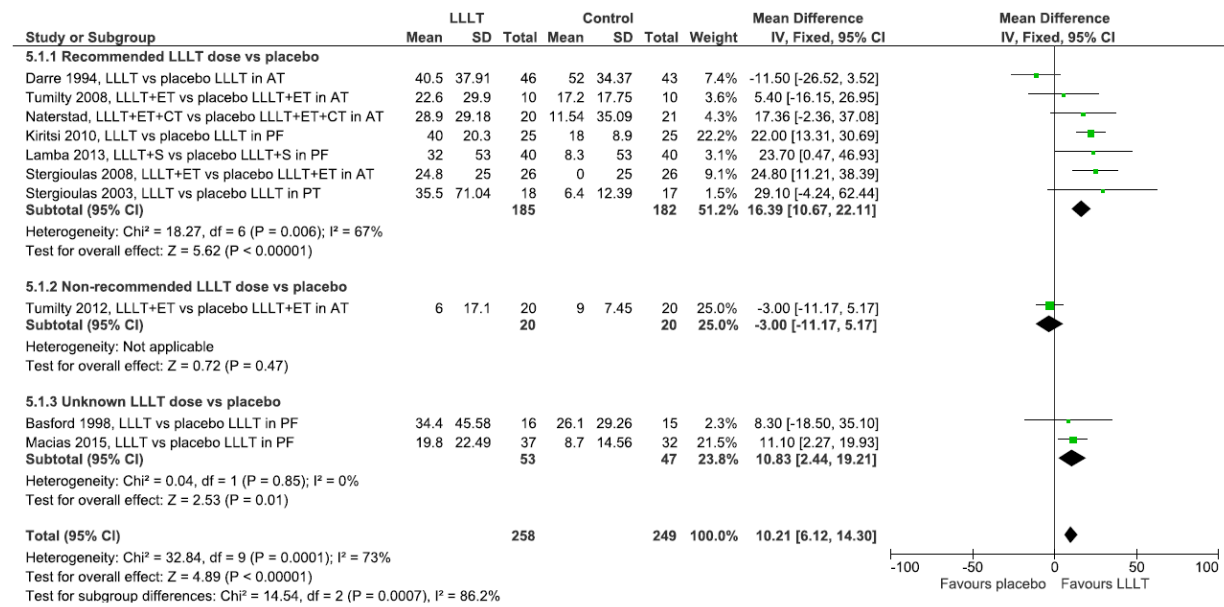

AT, Achilles tendinopathy; CT, cryotherapy; ET, exercise therapy; LLLT, Low-Level Laser Therapy; PF, plantar fasciitis; PT, patellar tendinopathy; S, stretching.

Funnel plot of pain results immediately after completed therapy indicating that small study bias is absent (Figure S16).

Figure S16 Funnel plot

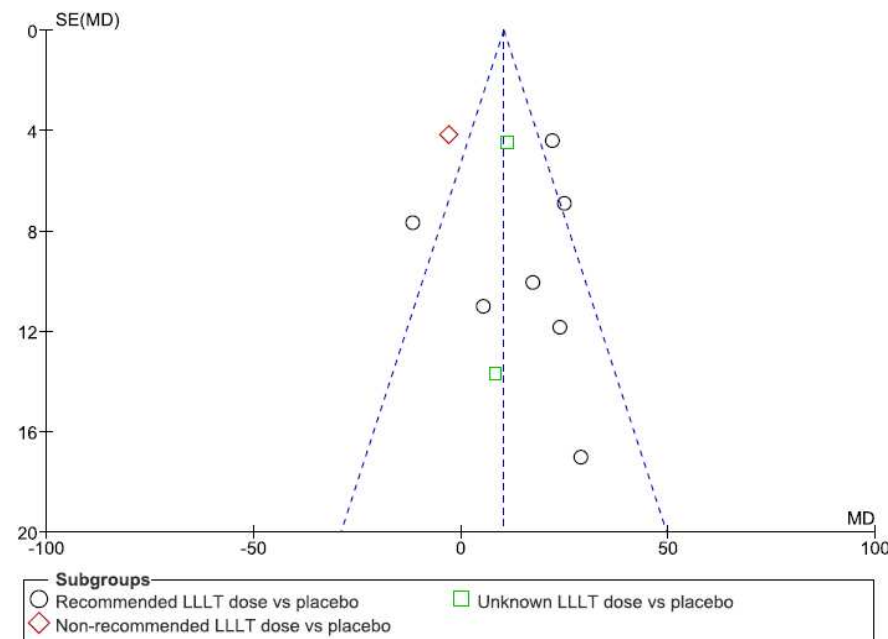

LLLT, Low-Level Laser Therapy; MD, mean difference; SE, standard error.



## References

1. Abat F, Sánchez-Sánchez JL, Martín-Nogueras AM, et al. Randomized controlled trial comparing the effectiveness of the ultrasound-guided galvanic electrolysis technique (USGET) versus conventional electro-physiotherapeutic treatment on patellar tendinopathy. *J Exp Orthop* 2016;3(1):34. doi: 10.1186/s40634-016-0070-4 [published Online First: 2016/11/18]
2. Aigner N, Fialka C, Weinstabl R, et al. Laser acupuncture for patellar tendinitis in athletes. [German]. *Akupunktur* 1996;24(1):11-14.
3. Ashok N, Raghul, S., Sivakumar, V.P.R. Compare The Effects of Low-Level Laser and Ultrasonic Therapy in Subjects with Jumper's Knee. *International Journal of Research and Scientific Innovation* 2018;V(I)
4. Atik OS. Photobiomodulation for Achilles Tendinopathy. *Photomedicine and laser surgery* 2018;36(1):1-2. doi: <http://dx.doi.org/10.1089/pho.2017.4361>
5. Bjordal JM, Lopes-Martins RA, Iversen VV. A randomised, placebo controlled trial of low level laser therapy for activated Achilles tendinitis with microdialysis measurement of peritendinous prostaglandin E2 concentrations. *Br J Sports Med* 2006;40(1):76-80; discussion 76-80. doi: 10.1136/bjsm.2005.020842 [published Online First: 2005/12/24]
6. Chang YP, Chiang H, Shih KS, et al. Effects of Therapeutic Physical Agents on Achilles Tendon Microcirculation. *J Orthop Sports Phys Ther* 2015;45(7):563-9. doi: 10.2519/jospt.2015.5681 [published Online First: 2015/06/04]
7. Cinar E, Uygur F. Extracorporeal shock wave therapy versus low intensity laser therapy in the treatment of heel pain. *Annals of the Rheumatic Diseases Conference: Annual European Congress of Rheumatology of the European League Against Rheumatism, EULAR* 2013;72(no pagination) doi: <http://dx.doi.org/10.1136/annrheumdis-2013-eular.1709>
8. Cinar E, Uygur F, Toprak Celenay S. The efficacy of low level laser therapy in the treatment of calcaneal spur. *Annals of the Rheumatic Disease Conference: Annual European Congress of Rheumatology of the European League Against Rheumatism, EULAR* 2012;71(no pagination) doi: <http://dx.doi.org/10.1136/annrheumdis-2012-eular.1438>
9. Costantino C, Pogliacomì F, Vaienti E. Cryoultrasound therapy and tendonitis in athletes: a comparative evaluation versus laser CO2 and t.e.ca.r. therapy. *Acta Biomed* 2005;76(1):37-41. [published Online First: 2005/08/25]
10. Coughlin M, Stevens F, Doty J, et al. Evaluation of low-level laser therapy at 635nm for the treatment of chronic plantar fasciitis: A placebo-controlled, randomized study. *Lasers in surgery and medicine* 2014;46:53-54. doi: <http://dx.doi.org/10.1002/lsm.22229>
11. Fernandes MS, Correia MG, Carvalho ML, et al. Laser therapy of inflammatory lesions of the soft parts of the locomotor system. [Portuguese]. *Acta medica portuguesa* 1991;4(6):293-96.
12. Foley J, Vasily DB, Bradle J, et al. 830 nm light-emitting diode (led) phototherapy significantly reduced return-to-play in injured university athletes: a pilot study. *Laser therapy* 2016;25(1):35-42. doi: 10.5978/islsm.16-OR-03 [published Online First: 2016/05/04]
13. Jastifer JR, Catena F, Doty JF, et al. Low-Level Laser Therapy for the Treatment of Chronic Plantar Fasciitis: A Prospective Study. *Foot & ankle international* 2014;35(6):566-71. doi: 10.1177/1071100714523275 [published Online First: 2014/02/11]
14. Lögdberg-Andersson M MS, Hazel Å. . Low level laser therapy of tendinitis and myofascial pain. A randomised double-blind controlled study. *Laser Therapy* 1997;9:79-86.
15. Mardh A, Lund I. High Power Laser for Treatment of Achilles Tendinosis - a Single Blind Randomized Placebo Controlled Clinical Study. *Journal of lasers in medical sciences* 2016;7(2):92-8. doi: 10.15171/jlms.2016.16 [published Online First: 2016/06/23]
16. Meier JK, K. . Traitement laser de la tendinite. *Médecine et hygiène* 1988;46(1741):907-11.
17. Morimoto Y, Saito A, Tokuhashi Y. Low level laser therapy for sports injuries. *Laser therapy* 2013;22(1):17-20. [published Online First: 2013/10/25]
18. Mulcahy D, McCormack D, McElwain J, et al. Low level laser therapy: a prospective double blind trial of its use in an orthopaedic population. *Injury* 1995;26(5):315-17. doi: [https://doi.org/10.1016/0020-1383\(95\)00048-E](https://doi.org/10.1016/0020-1383(95)00048-E)

19. Notarnicola A, Maccagnano G, Tafuri S, et al. CHELT therapy in the treatment of chronic insertional Achilles tendinopathy. *Lasers Med Sci* 2014;29(3):1217-25. doi: 10.1007/s10103-013-1510-3 [published Online First: 2013/12/20]
20. Oliveira FS, Pinfieldi CE, Parizoto NA, et al. Effect of low level laser therapy (830 nm) with different therapy regimes on the process of tissue repair in partial lesion calcaneus tendon. *Lasers in surgery and medicine* 2009;41(4):271-76. doi: <http://dx.doi.org/10.1002/lsm.20760>
21. Orellana Molina A, Hernandez Diaz A, Larrea Cox PJ, et al. Laser infrarrojo frente a acupuntura en el tratamiento del espolon calcaneo (Infrared laser versus acupuncture in the treatment of heel spurs) [Spanish]. *Revista de la Sociedad Espanola del Dolor* 2010 Mar;17(2):69-77 2010
22. Saxena A, St Louis M, Fournier M. Vibration and pressure wave therapy for calf strains: a proposed treatment. *Muscles Ligaments Tendons J* 2013;3(2):60-2. doi: 10.11138/mltj/2013.3.2.060 [published Online First: 2013/07/28]
23. Scott A, Backman LJ, Speed C. Tendinopathy: Update on Pathophysiology. *Journal of Orthopaedic & Sports Physical Therapy* 2015;45(11):833-41. doi: 10.2519/jospt.2015.5884
24. Siebert W, Seichert N, Siebert B, et al. What is the efficacy of "soft" and "mid" lasers in therapy of tendinopathies? A double-blind study. *Archives of Orthopaedic and Trauma Surgery* 1987 Oct;106(6):358-363 1987
25. Simunovic Z. Low level laser therapy with trigger points technique: A clinical study on 243 patients. *Journal of Clinical Laser Medicine and Surgery* 1996;14(4):163-67.
26. Suleymanoglu T, Esmailzadeh S, Sen EI, et al. The effects of radial shock wave therapy and low level laser therapy in the treatment of chronic plantar fasciitis: A randomized controlled trial. *Annals of the Rheumatic Diseases Conference: Annual European Congress of Rheumatology of the European League Against Rheumatism, EULAR* 2014;73(no pagination) doi: <http://dx.doi.org/10.1136/annrheumdis-2014-eular.3359>
27. Takla MKN, Rezk SSR. Clinical effectiveness of multi-wavelength photobiomodulation therapy as an adjunct to extracorporeal shock wave therapy in the management of plantar fasciitis: a randomized controlled trial. *Lasers in Medical Science* 2019 Apr;34(3):583-593 2019
28. Tumilty S, Baxter GD. Heavy load eccentric exercise for achilles tendinopathy; too much of a good thing? *Physiotherapy (United Kingdom)* 2015;101:eS1546-eS47. doi: <http://dx.doi.org/10.1016/j.physio.2015.03.1541>
29. Tumilty S, Mani R, Baxter GD. Photobiomodulation and eccentric exercise for Achilles tendinopathy: a randomized controlled trial. *Lasers in Medical Science* 2016 Jan;31(1):127-135 2016
